# Supplementary material for: Comparative study on in situ surface cleaning effect of intrinsic oxide-covering GaAs surface using TMA precursor and Al2O3 buffer layer for HfGdO gate dielectrics
Source: Royal Society of Chemistry journal article supplement (doi:10.1039/c8tc00070k), 2018-01-01
Supplement: c8tc00070k1.pdf [file c8tc00070k1.pdf]

**Comparative study on in-situ surface cleaning effect of intrinsic oxide  
covering GaAs surface using TMA precursor and Al<sub>2</sub>O<sub>3</sub> buffer layer  
for HfGdO gate dielectrics**

Juan Gao,<sup>a,b,c</sup> Gang He,<sup>a\*</sup> Shuang Liang,<sup>a</sup> Die Wang<sup>a</sup> and Bing Yang<sup>a</sup>

*<sup>a</sup>School of physics and Materials Science, Radiation Detection Materials & Devices  
Lab, Anhui University, Hefei 230601, China.*

*<sup>b</sup>School of Mechanics and Photoelectric Physics, Anhui University of Science and  
Technology, Huainan 232001, China*

*<sup>c</sup>Co-operative Innovation Research Center for Weak Signal-Detecting Materials and  
Devices Integration Anhui University, Hefei 230601, China*

**Corresponding Author**

\* To whom correspondence should be addressed.

Prof. Gang He, E-mail: hegang@ahu.edu.cn

---

\*Email: hegang@ahu.edu.cn

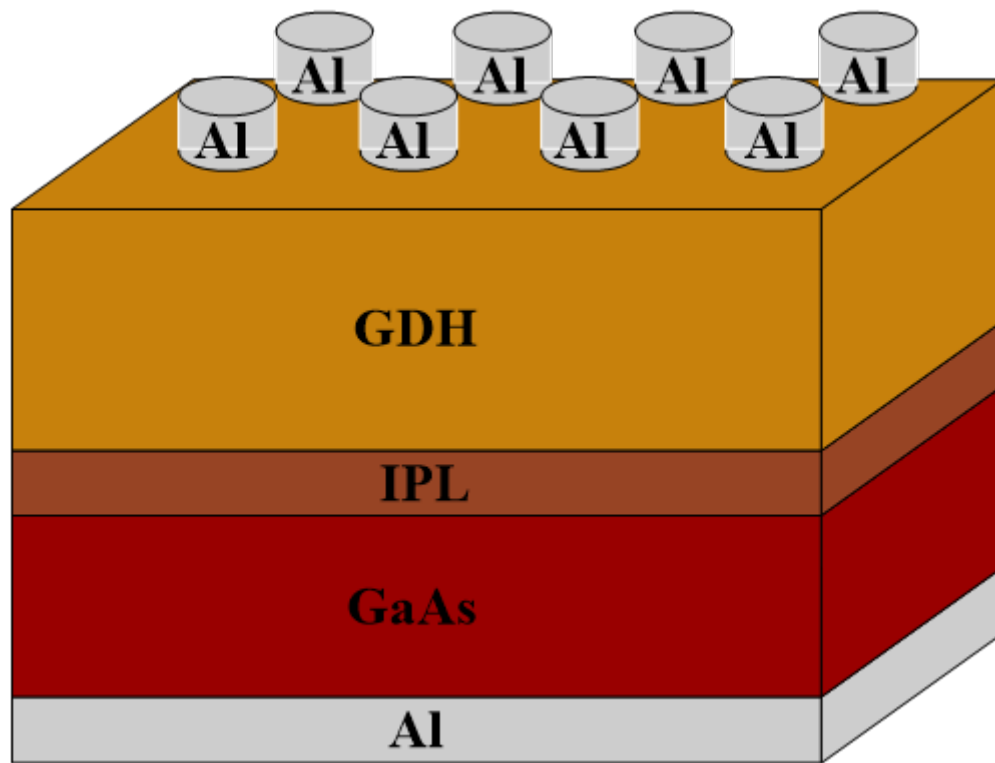

**Fig. S1** The Schematic diagram of Al/GDH/IPL/GaAs/Al MOS capacitor device structure.
